# Supplementary material
Source: PubMed Central journal article supplement (PMC2680708)
Supplement: NIHMS68113-supplement-Supp__File.pdf [file NIHMS68113-supplement-Supp__File.pdf]

A regulatable switch mediates self-association in an immunoglobulin fold  
Matthew F. Calabrese, Catherine M. Eakin, Jimin M. Wang, and Andrew D. Miranker

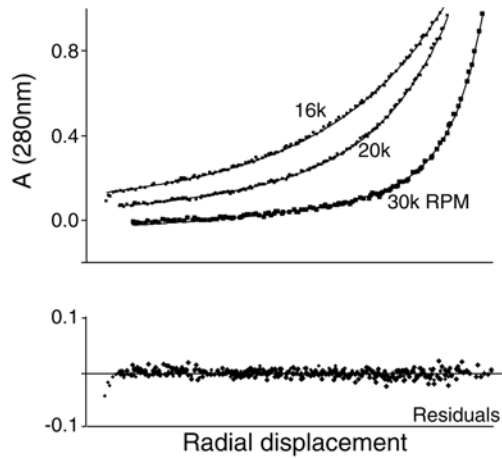

**Supplementary Figure 1:** Sedimentation equilibrium analytical ultracentrifugation of  $H13F_{\text{holo}}$ . Displayed in the upper panel is a portion of the global analysis derived from  $30 \mu\text{M } H13F_{\text{holo}}$ . Data (points) and fit (solid-line) are overlaid. Lower panel shows a superposition of the residuals.

A regulatable switch mediates self-association in an immunoglobulin fold  
Matthew F. Calabrese, Catherine M. Eakin, Jimin M. Wang, and Andrew D. Miranker

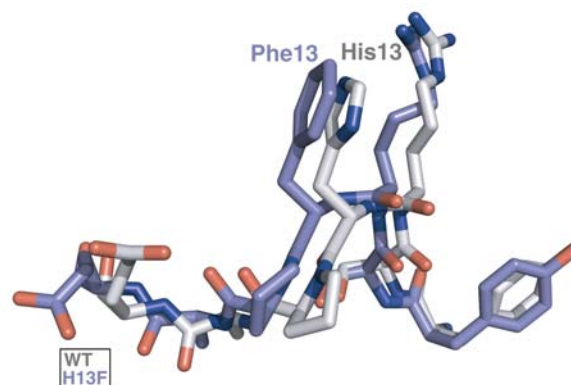

**Supplementary Figure 2** Overlay of position 13 in WT and H13F. Stick representation of WT<sub>apo</sub> (gray) and H13F<sub>holo</sub> (blue) in the region surrounding residue 13.

A regulatable switch mediates self-association in an immunoglobulin fold  
Matthew F. Calabrese, Catherine M. Eakin, Jimin M. Wang, and Andrew D. Miranker

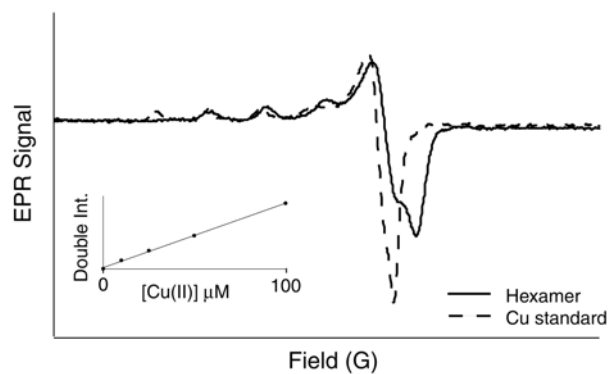

**Supplementary Figure 3**  $\text{Cu}^{2+}$  binding stoichiometry by EPR. Shown as a solid line is a sample of  $\text{Cu}^{2+}$ -bound hexameric H13F (at 50  $\mu\text{M}$  in monomeric units). Dashed line shows a 50  $\mu\text{M}$   $\text{Cu}^{2+}$  standard. Inset is a linear fit to a standard curve. The  $\text{Cu}^{2+}$  stoichiometry in these oligomers is 1.1  $\pm$  0.2. Error represents one standard deviation.

A regulatable switch mediates self-association in an immunoglobulin fold  
Matthew F. Calabrese, Catherine M. Eakin, Jimin M. Wang, and Andrew D. Miranker

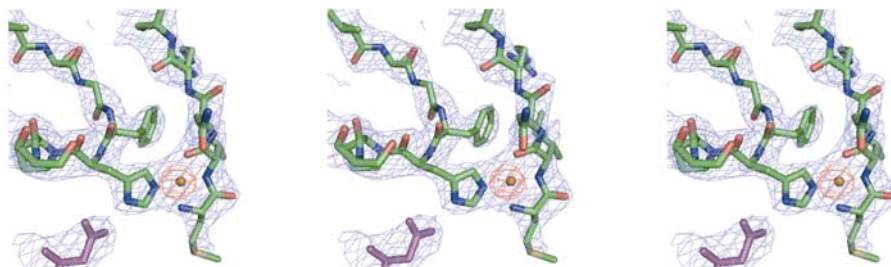

**Supplementary Figure 4** Electron Density map of  $\text{Cu}^{2+}$  binding site.  $\text{Cu}^{2+}$  binding site and surrounding residues shown in wall eye (left pair) and cross-eye (right pair) stereo. The model is presented with an overlay of an annealed composite omit map contoured at  $1.5 \sigma$  (blue). Also shown is an anomalous difference Fourier map contoured at  $7 \sigma$  (red). The location of the  $\text{Cu}^{2+}$  ion is marked by an orange sphere. Shown in magenta is Asp34 from an adjacent chain.

A regulatable switch mediates self-association in an immunoglobulin fold  
 Matthew F. Calabrese, Catherine M. Eakin, Jimin M. Wang, and Andrew D. Miranker

| <b>Chain</b>   | <b>Atoms</b>    | <b>Bond (Å)</b> | <b>Atoms</b>        | <b>Angle (°)</b> |
|----------------|-----------------|-----------------|---------------------|------------------|
| A              | Nterm-Cu        | 2.4             | Nterm-Cu-His        | 113              |
|                | His-Cu          | 1.9             | His—Cu-CO           | 97               |
|                | CO-Cu           | 2.5             | CO-Cu-NH            | 77               |
|                | NH-Cu           | 2.2             | NH-Cu-Nterm         | 72               |
| B              | Nterm-Cu        | 2.2             | Nterm-Cu-His        | 99               |
|                | His-Cu          | 2.0             | His—Cu-CO           | 111              |
|                | CO-Cu           | 1.9             | CO-Cu-NH            | 75               |
|                | NH-Cu           | 2.4             | NH-Cu-Nterm         | 74               |
| C              | Nterm-Cu        | 2.2             | Nterm-Cu-His        | 95               |
|                | His-Cu          | 2.0             | His—Cu-CO           | 114              |
|                | CO-Cu           | 2.7             | CO-Cu-NH            | 74               |
|                | NH-Cu           | 2.2             | NH-Cu-Nterm         | 75               |
| D              | Nterm-Cu        | 2.5             | Nterm-Cu-His        | 107              |
|                | His-Cu          | 1.9             | His—Cu-CO           | 99               |
|                | CO-Cu           | 2.0             | CO-Cu-NH            | 78               |
|                | NH-Cu           | 2.3             | NH-Cu-Nterm         | 73               |
| E              | Nterm-Cu        | 2.3             | Nterm-Cu-His        | 110              |
|                | His-Cu          | 2.0             | His—Cu-CO           | 83               |
|                | CO-Cu           | 2.0             | CO-Cu-NH            | 88               |
|                | NH-Cu           | 2.0             | NH-Cu-Nterm         | 79               |
| F              | Nterm-Cu        | 2.4             | Nterm-Cu-His        | 103              |
|                | His-Cu          | 2.1             | His—Cu-CO           | 111              |
|                | CO-Cu           | 2.7             | CO-Cu-NH            | 72               |
|                | NH-Cu           | 2.3             | NH-Cu-Nterm         | 72               |
| <b>Average</b> | <b>Nterm-Cu</b> | <b>2.3±0.1</b>  | <b>Nterm-Cu-His</b> | <b>104±7</b>     |
|                | <b>His-Cu</b>   | <b>2.0±0.1</b>  | <b>His—Cu-CO</b>    | <b>103±12</b>    |
|                | <b>CO-Cu</b>    | <b>2.3±0.4</b>  | <b>CO-Cu-NH</b>     | <b>77±6</b>      |
|                | <b>NH-Cu</b>    | <b>2.2±0.1</b>  | <b>NH-Cu-Nterm</b>  | <b>74±3</b>      |

**Supplementary Table 1** Bond lengths and angles for Cu<sup>2+</sup> coordination in each chain of the hexamer. Nterm refers to the N-terminus, NH and CO refer to the backbone amide and carbonyl of Ile1, His refers to the epsilon-Nitrogen of the His31 imidazole ring. Errors on averages represent ± 1 standard deviation.
